# Supplementary material for: A multicenter survey on endoscopic retrograde cholangiopancreatography during the COVID-19 pandemic in northern and central Italy
Source: PubMed Central journal article supplement — Endosc Int Open. 2021 Apr 15;9(4):E629–34. doi: 10.1055/a-1380-3419 (PMC8050562; doi:10.1055/a-1380-3419), 2021-04-15
Supplement: 2189supmat_10-1055-a-1380-3419.pdf [file 2189supmat_10-1055-a-1380-3419.pdf]

## Supplementary material

Survey questionnaire:

City\_\_\_\_\_

Center name/Hospital\_\_\_\_\_

Director\_\_\_\_\_

- ERCP operators N.\_\_\_\_ ERCP trainees N.\_\_\_\_\_
- ERCP nurses N.\_\_\_\_\_
- ERCPs performed in 2019: N.\_\_\_\_\_
- ERCPs performed from March 8<sup>th</sup> to April 30<sup>th</sup> 2019: N.\_\_\_\_\_
  
- Has your center adopted a triage/screening protocol for ERCP patients?  
 Yes      No
  - If you answered “yes”, what does it consist of (multiple answers allowed)?
    - Epidemiologic history (close contacts with SAR-CoV-2 positive people, recent travel to first epidemic countries or Italian “red zones”)
    - Clinical history (COVID-19 symptoms during the last 2 weekd)
    - Nasopharyngeal swab
      - For all ERCP patients
      - Only for positive epidemiologic history or symptomatic patients
    - Chest CT scan:
      - For all ERCP patients
      - For patients with a positive swab
      - For symptomatic patients with a negative swab
- ERCPs performed from March 8<sup>th</sup> to April 30<sup>th</sup> 2020: N.\_\_\_\_\_, of whom N.\_\_\_\_ had an intact papilla N.\_\_\_\_\_
  - Sex (N.): M\_\_\_\_ F\_\_\_\_
  - Age (N.): ≥90\_\_\_\_ 80-89\_\_\_\_ 70-79\_\_\_\_ 60-69\_\_\_\_ 50-59\_\_\_\_ 40-49\_\_\_\_ <40\_\_\_\_
- ERCPs performed in confirmed COVID-19 patients (positive swab and/or chest CT scan) N.\_\_\_\_\_

## Supplementary material

- Sex (N.): M\_\_\_\_ F\_\_\_\_
  - Age (N.): ≥90\_\_\_\_ 80-89\_\_\_\_ 70-79\_\_\_\_ 60-69\_\_\_\_ 50-59\_\_\_\_ 40-49\_\_\_\_ <40\_\_\_\_
- Is your usual ERCP room provided with negative pressure? Yes No
- Do you perform SARS-CoV-2 patients ERCPs in a different room? Yes No
  - If you answered "Yes", is the room provided with negative pressure? Yes No
- What is your usual sedation practice for ERCP?
  - General anaesthesia
  - Deep sedation
  - Conscious sedation
- Has the COVID-19 pandemic led you to routinely use general anaesthesia?
  - For all patients
  - For SARS-CoV-2 positive patients only
- PPE use:
  - N95/FFP2/FFP3 respirators for all patients
  - N95/FFP2/FFP3 respirators for SARS-CoV-2 positive patients only
  - Water-resistant gown for all patients
  - Water-resistant gown for SARS-CoV-2 positive patients only
  - Face-shield for all patients
  - Face-shield for SARS-CoV-2 positive patients only
  - Double pair of gloves
  - Surgical hair cap
- Did the COVID-19 pandemic trigger a change/optimization in the reprocessing of endoscopes in your center? Yes  
No
- SARS-CoV-2 positive ERCP operators from March 8<sup>th</sup> to April 30<sup>th</sup> 2020 N.\_\_\_\_
- SARS-CoV-2 positive ERCP nurses from March 8<sup>th</sup> to April 30<sup>th</sup> 2020 N.\_\_\_\_
- ERCP indication from March 8<sup>th</sup> to April 30<sup>th</sup> :

## Supplementary material

- Acute cholangitis (benign or neoplastic etiology) N. \_\_\_\_\_
  - Acute pancreatitis N. \_\_\_\_\_
  - Common bile duct stone(s) without cholangitis nor acute pancreatitis N. \_\_\_\_\_
  - Obstructive jaundice caused by a newly diagnosed low tumor (suspected or confirmed) N. \_\_\_\_\_
  - Iatrogenic bile leak or stenosis N. \_\_\_\_\_
  - Post-OLT biliary stenosis N. 0 \_\_\_\_\_
  - Ampulloma N. \_\_\_\_\_ for which papillectomy was performed in N. \_\_\_\_\_
  - Perihilar cholangiocarcinoma perilare (suspected or confirmed) N. \_\_\_\_\_
  - Biliary stenosis in chronic pancreatitis N. \_\_\_\_\_
  - Papillary stenosis of unknown origin N. \_\_\_\_\_
  - Biliary stent replacement N. \_\_\_\_\_
  - Recurrent pancreatitis in pancreas divisum N. \_\_\_\_\_
  - Main pancreatic duct stenosis or stone N. \_\_\_\_\_
  - Pancreatic stent replacement N. \_\_\_\_\_
  - Other (specify) N. \_\_\_\_\_
- Did the trainees continue their training? Yes      No      Training reduced
    - If you answered “No” or “Training reduced”, why?:
      - Reassignment to other Gastroenterology activities
      - Reassignment to COVID wards
      - Reassignment to non-COVID wards
      - Limited availability of PPE
      - Trainee infected by SARS-CoV-2
- Follow up two weeks after the procedure:

## Supplementary material

- N. of patients who developed COVID symptoms (fever, cough, dyspnea, anosmia/ageusia, rhinitis, diarrhea – not otherwise explained) N. \_\_\_\_\_
- N. of confirmed positive patients (positive swab and/or chest CT scan) N. \_\_\_\_\_
- ERCP adverse events:
  - Post-ERCP acute pancreatitis N. \_\_\_\_\_ of which severe AP (organ failure >48 hours or inpatient for ≥10 days or percutaneous/surgical treatment) N. \_\_\_\_\_
  - Bleeding N. \_\_\_\_\_ of which severe bleeding (≥5 units of packed red blood cells transfusion or angiography/surgery) N. \_\_\_\_\_
  - Perforation N. \_\_\_\_\_ of which severe perforation (inpatient for ≥10 days or percutaneous/surgical treatment) N. \_\_\_\_\_
  - Cholangitis-cholecistitis N. \_\_\_\_\_ of which severe cholangitis-cholecistitis (septic shock or surgical treatment) N. \_\_\_\_\_
  - Other (specify) N. \_\_\_\_\_ of which severe (inpatient for ≥10 days) N. \_\_\_\_\_
  - Death N. \_\_\_\_\_
